# Supplementary material
Source: Springer Nature journal article supplement (https://www.springermedizin.de/resource/supplementary/40478_2013_59_MOESM14_ESM.pdf/25658004)

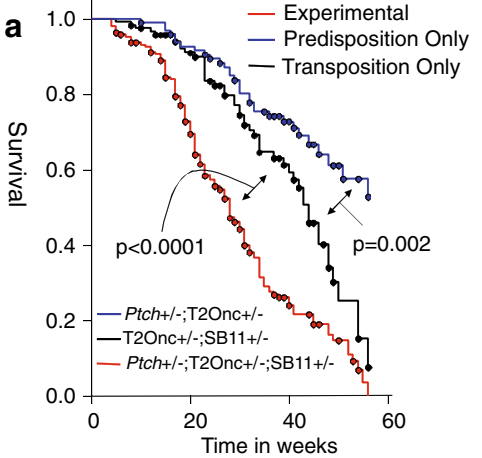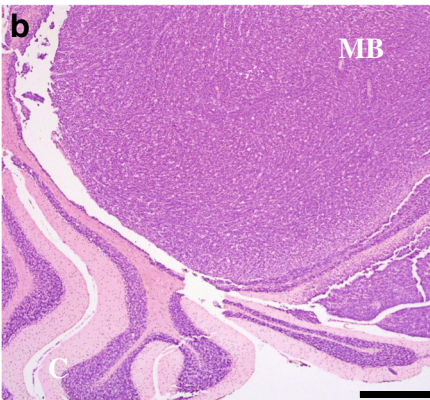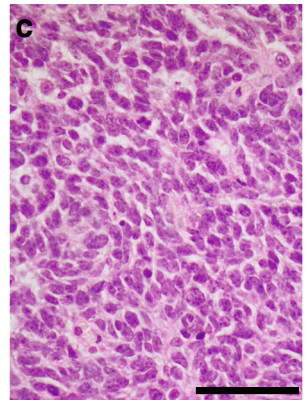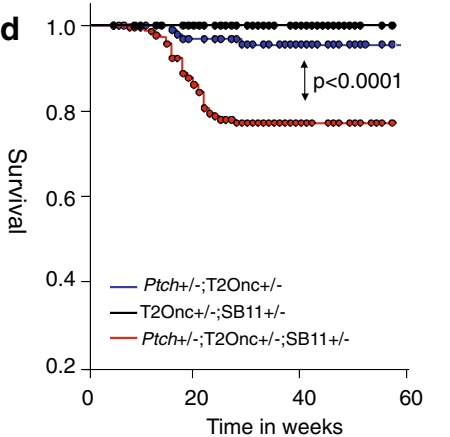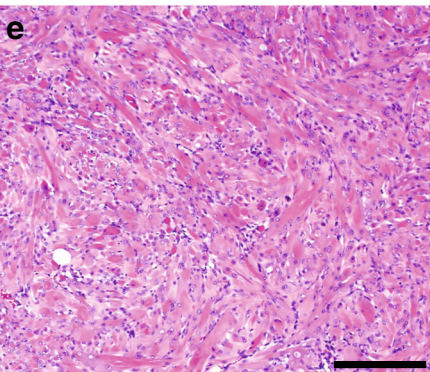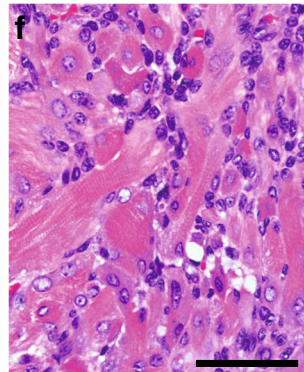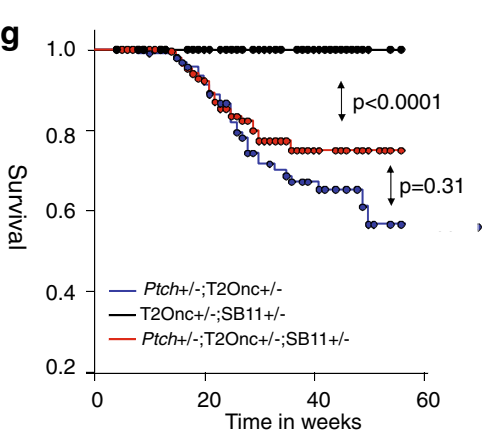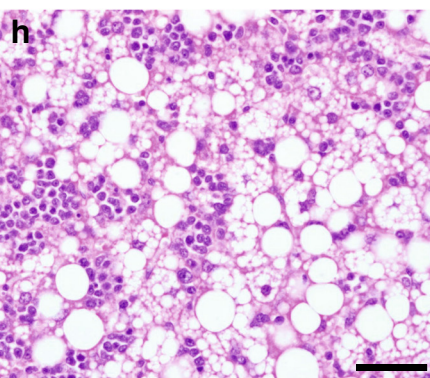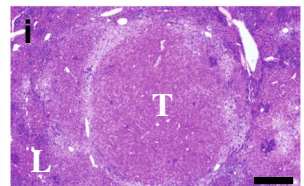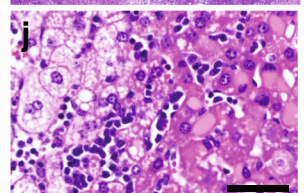

Supplement: MOESM14 [file 25658004]
